# Supplementary material
Source: PubMed Central journal article supplement (PMC9481743)
Supplement: NIHMS1790393-supplement-1.pdf [file NIHMS1790393-supplement-1.pdf]

## SUPPLEMENTARY METHODS

### Calculation of NCI comorbidity index

NCI comorbidity index was calculated to measure noncancer comorbidity as follows:  $\text{NCI index} = 1.14 * (\text{Acute Myocardial Infarction}) + 1.08 * (\text{History of Myocardial Infarction}) + 1.91 * (\text{Congestive Heart Failure}) + 1.30 * (\text{Peripheral Vascular Disease}) + 1.32 * (\text{Cerebrovascular Disease}) + 1.69 * (\text{Chronic Obstructive Pulmonary Disease}) + 2.06 * (\text{Dementia}) + 1.49 * (\text{Hemiplegia or Paraplegia}) + 1.60 * (\text{Moderate-Severe Renal Disease}) + 1.08 * (\text{Peptic Ulcer Disease}) + 1.25 * (\text{Rheumatologic Disease}) + 1.79 * (\text{AIDS})$ .

Journal Pre-proof

**SUPPLEMENTARY TABLES**

**Supplementary Table 1. International Classification of Diseases (ICD)-9 and 10 codes for defining the etiologies of HCC, cirrhosis and its complications.**

| <b>Etiology</b> | <b>ICD-9 codes</b> | <b>ICD-10 codes</b> | <b>ICD-9 Description</b>                                                                                    | <b>ICD-10 Description</b>                                                                                            |
|-----------------|--------------------|---------------------|-------------------------------------------------------------------------------------------------------------|----------------------------------------------------------------------------------------------------------------------|
| <b>HCV</b>      | 07041              | B1711               | Acute hepatitis C with hepatic coma                                                                         | Acute hepatitis C with hepatic coma                                                                                  |
|                 | 07044              | B182                | Chronic hepatitis C with hepatic coma                                                                       | Chronic viral hepatitis C                                                                                            |
|                 | 07051              | B1710               | Acute hepatitis C without mention of hepatic coma                                                           | Acute hepatitis C without hepatic coma                                                                               |
|                 | 07054              | B182                | Chronic hepatitis C without mention of hepatic coma                                                         | Chronic viral hepatitis C                                                                                            |
|                 | 0707               | NA                  | Unspecified viral hepatitis C without hepatic coma                                                          | NA                                                                                                                   |
|                 | 07070              | B1920               | Unspecified viral hepatitis C without hepatic coma                                                          | Unspecified viral hepatitis C without hepatic coma                                                                   |
|                 | 07071              | B1921               | Unspecified viral hepatitis C with hepatic coma                                                             | Unspecified viral hepatitis C with hepatic coma                                                                      |
|                 | V0262              | Z2252               | Hepatitis C carrier                                                                                         | Carrier of viral hepatitis C                                                                                         |
|                 |                    |                     |                                                                                                             |                                                                                                                      |
|                 |                    |                     |                                                                                                             |                                                                                                                      |
| <b>HBV</b>      | 0702               | NA                  | Viral hepatitis b with hepatic coma                                                                         | NA                                                                                                                   |
|                 | 07020              | B162<br>B1911       | Viral hepatitis B with hepatic coma, acute or unspecified, without mention of hepatitis delta               | Acute hepatitis B without delta-agent with hepatic coma<br>Unspecified viral hepatitis B with hepatic coma           |
|                 | 07021              | B160                | Viral hepatitis B with hepatic coma, acute or unspecified, with hepatitis delta                             | Acute hepatitis B with delta-agent with hepatic coma                                                                 |
|                 | 07022              | B181                | Chronic viral hepatitis B with hepatic coma without hepatitis delta                                         | Chronic viral hepatitis B without delta-agent                                                                        |
|                 | 07023              | B180                | Chronic viral hepatitis B with hepatic coma with hepatitis delta                                            | Chronic viral hepatitis B with delta-agent                                                                           |
|                 | 0703               | NA                  | Viral hepatitis b without mention of hepatic coma                                                           | NA                                                                                                                   |
|                 | 07030              | B169<br>B1910       | Viral hepatitis B without mention of hepatic coma, acute or unspecified, without mention of hepatitis delta | Acute hepatitis B without delta-agent and without hepatic coma<br>Unspecified viral hepatitis B without hepatic coma |
|                 | 07031              | B161                | Viral hepatitis B without mention of hepatic coma, acute or unspecified, with hepatitis delta               | Acute hepatitis B with delta-agent without hepatic coma                                                              |
|                 | 07032              | B181                | Chronic viral hepatitis B without mention of hepatic coma without mention of hepatitis delta                | Chronic viral hepatitis B without delta-agent                                                                        |
|                 | 07033              | B180                | Chronic viral hepatitis B without mention of hepatic coma with hepatitis delta                              | Chronic viral hepatitis B with delta-agent                                                                           |
| V0261           | Z2251              | Hepatitis B carrier | Carrier of viral hepatitis B                                                                                |                                                                                                                      |
|                 |                    |                     |                                                                                                             |                                                                                                                      |
|                 |                    |                     |                                                                                                             |                                                                                                                      |
| <b>ALD</b>      | 291                | NA                  | Alcohol-induced mental disorders                                                                            | NA                                                                                                                   |
|                 | 2910               | F10231              | Alcohol withdrawal delirium                                                                                 | Alcohol dependence with withdrawal delirium                                                                          |
|                 | 2911               | F1096               | Alcohol-induced persisting amnesic disorder                                                                 | Alcohol use, unspecified with alcohol-induced persisting amnesic disorder                                            |
|                 | 2912               | F1027               | Alcohol-induced persisting dementia                                                                         | Alcohol dependence with alcohol-induced persisting dementia                                                          |

|  |       |         |                                                        |                                                                                      |
|--|-------|---------|--------------------------------------------------------|--------------------------------------------------------------------------------------|
|  | 2913  | F10951  | Alcohol-induced psychotic disorder with hallucinations | Alcohol use, unspecified with alcohol-induced psychotic disorder with hallucinations |
|  | 2914  | F10929  | Idiosyncratic alcohol intoxication                     | Alcohol use, unspecified with intoxication, unspecified                              |
|  | 2915  | F10950  | Alcohol-induced psychotic disorder with delusions      | Alcohol use, unspecified with alcohol-induced psychotic disorder with delusions      |
|  | 2919  | F1099   | Unspecified alcohol-induced mental disorders           | Alcohol use, unspecified with unspecified alcohol-induced disorder                   |
|  | 3575  | G621    | Alcoholic polyneuropathy                               | Alcoholic polyneuropathy                                                             |
|  | 4255  | I426    | Alcoholic cardiomyopathy                               | Alcoholic cardiomyopathy                                                             |
|  | 5710  | K700    | Alcoholic fatty liver                                  | Alcoholic fatty liver                                                                |
|  | 5711  | K7010   | Acute alcoholic hepatitis                              | Alcoholic hepatitis without ascites                                                  |
|  | 5712  | K7030   | Alcoholic cirrhosis of liver                           | Alcoholic cirrhosis of liver without ascites                                         |
|  | 5713  | K709    | Alcoholic liver damage, unspecified                    | Alcoholic liver disease, unspecified                                                 |
|  | 7903  | R780    | Excessive blood level of alcohol                       | Finding of alcohol in blood                                                          |
|  | 9808  | T518X1A | Toxic effect of other specified alcohols               | Toxic effect of other alcohols, accidental (unintentional), initial encounter        |
|  | 9808  | T518X2A | Toxic effect of other specified alcohols               | Toxic effect of other alcohols, intentional self-harm, initial encounter             |
|  | 9808  | T518X3A | Toxic effect of other specified alcohols               | Toxic effect of other alcohols, assault, initial encounter                           |
|  | 9808  | T518X4A | Toxic effect of other specified alcohols               | Toxic effect of other alcohols, undetermined, initial encounter                      |
|  | 9809  | T5191XA | Toxic effect of unspecified alcohol                    | Toxic effect of unspecified alcohol, accidental (unintentional), initial encounter   |
|  | 9809  | T5192XA | Toxic effect of other specified alcohols               | Toxic effect of unspecified alcohol, intentional self-harm, initial encounter        |
|  | 9809  | T5193XA | Toxic effect of other specified alcohols               | Toxic effect of unspecified alcohol, assault, initial encounter                      |
|  | 9809  | T5194XA | Toxic effect of other specified alcohols               | Toxic effect of unspecified alcohol, undetermined, initial encounter                 |
|  | 29181 | F10239  | Alcohol withdrawal                                     | Alcohol dependence with withdrawal, unspecified                                      |
|  | 29182 | F10182  | Alcohol induced sleep disorders                        | Alcohol abuse with alcohol-induced sleep disorder                                    |
|  | 29182 | F10282  | Alcohol induced sleep disorders                        | Alcohol dependence with alcohol-induced sleep disorder                               |
|  | 29182 | F10982  | Alcohol induced sleep disorders                        | Alcohol use, unspecified with alcohol-induced sleep disorder                         |
|  | 29189 | F10159  | Other alcohol-induced mental disorders                 | Alcohol abuse with alcohol-induced psychotic disorder, unspecified                   |
|  | 29189 | F10180  | Other alcohol-induced mental disorders                 | Alcohol abuse with alcohol-induced anxiety disorder                                  |
|  | 29189 | F10181  | Other alcohol-induced mental disorders                 | Alcohol abuse with alcohol-induced sexual dysfunction                                |
|  | 29189 | F10188  | Other alcohol-induced mental disorders                 | Alcohol abuse with other alcohol-induced disorder                                    |
|  | 29189 | F10259  | Other alcohol-induced mental disorders                 | Alcohol dependence with alcohol-induced psychotic disorder, unspecified              |
|  | 29189 | F10280  | Other alcohol-induced mental disorders                 | Alcohol dependence with alcohol-induced anxiety disorder                             |

|                                   |       |                         |                                                          |                                                                                                        |
|-----------------------------------|-------|-------------------------|----------------------------------------------------------|--------------------------------------------------------------------------------------------------------|
|                                   | 29189 | F10281                  | Other alcohol-induced mental disorders                   | Alcohol dependence with alcohol-induced sexual dysfunction                                             |
|                                   | 29189 | F10288                  | Other alcohol-induced mental disorders                   | Alcohol dependence with other alcohol-induced disorder                                                 |
|                                   | 29189 | F10959                  | Other alcohol-induced mental disorders                   | Alcohol use, unspecified with alcohol-induced psychotic disorder, unspecified                          |
|                                   | 29189 | F10980                  | Other alcohol-induced mental disorders                   | Alcohol use, unspecified with alcohol-induced anxiety disorder                                         |
|                                   | 303   | NA                      | Alcohol dependence syndrome                              | NA                                                                                                     |
|                                   | 30300 | F10229                  | Acute alcoholic intoxication in alcoholism, unspecified  | Alcohol dependence with intoxication, unspecified                                                      |
|                                   | 30301 | F10229                  | Acute alcoholic intoxication in alcoholism, continuous   | Alcohol dependence with intoxication, unspecified                                                      |
|                                   | 30302 | F10229                  | Acute alcoholic intoxication in alcoholism, episodic     | Alcohol dependence with intoxication, unspecified                                                      |
|                                   | 30303 | F10229                  | Acute alcoholic intoxication in alcoholism, in remission | Alcohol dependence with intoxication, unspecified                                                      |
|                                   | 3039  | NA                      | Other and unspecified alcohol dependence                 | NA                                                                                                     |
|                                   | 30390 | F1020                   | Other and unspecified alcohol dependence, unspecified    | Alcohol dependence, uncomplicated                                                                      |
|                                   | 30391 | F1020                   | Other and unspecified alcohol dependence, continuous     | Alcohol dependence, uncomplicated                                                                      |
|                                   | 30392 | F1020                   | Other and unspecified alcohol dependence, episodic       | Alcohol dependence, uncomplicated                                                                      |
|                                   | 30393 | F1021                   | Other and unspecified alcohol dependence, in remission   | Alcohol dependence, in remission                                                                       |
|                                   | 30500 | F1010                   | Alcohol abuse, unspecified                               | Alcohol abuse, uncomplicated                                                                           |
|                                   | 30501 | F1010                   | Alcohol abuse, continuous                                | Alcohol abuse, uncomplicated                                                                           |
|                                   | 30502 | F1010                   | Alcohol abuse, episodic                                  | Alcohol abuse, uncomplicated                                                                           |
|                                   | 30503 | F1011                   | Alcohol abuse, in remission                              | Alcohol abuse, in remission                                                                            |
|                                   | 53530 | K2920                   | Alcoholic gastritis, without mention of hemorrhage       | Alcoholic gastritis without bleeding                                                                   |
|                                   | 53531 | K2921                   | Alcoholic gastritis, with hemorrhage                     | Alcoholic gastritis with bleeding                                                                      |
|                                   | E8600 | NoDx                    | Accidental poisoning by alcoholic beverages              | NA                                                                                                     |
|                                   | E8608 | NoDx                    | Accidental poisoning by other specified alcohols         | NA                                                                                                     |
|                                   | E8609 | NoDx                    | Accidental poisoning by unspecified alcohol              | NA                                                                                                     |
|                                   | V113  | Z658                    | Personal history of alcoholism                           | Other specified problems related to psychosocial circumstances                                         |
|                                   |       |                         |                                                          |                                                                                                        |
|                                   |       |                         |                                                          |                                                                                                        |
| <b>Others</b>                     |       |                         |                                                          |                                                                                                        |
| Alpha-1-antitrypsin deficiency    | 2734  | E8801                   | Alpha-1-antitrypsin deficiency                           | Alpha-1-antitrypsin deficiency                                                                         |
| Disorders of iron metabolism      | 2750  | NA                      | Disorders of iron metabolism                             | NA                                                                                                     |
| Disorders of copper metabolism    | 2751  | E8300<br>E8301<br>E8309 | Disorders of copper metabolism                           | Disorder of copper metabolism, unspecified<br>Wilson's disease<br>Other disorders of copper metabolism |
| Disorders of porphyrin metabolism | 2771  | E800<br>E8020<br>E8029  | Disorders of porphyrin metabolism                        | Hereditary erythropoietic porphyria<br>Unspecified porphyria<br>Other porphyria                        |

|                                                             |        |                  |                                                             |                                                             |
|-------------------------------------------------------------|--------|------------------|-------------------------------------------------------------|-------------------------------------------------------------|
| Hereditary hemochromatosis                                  | 27501  | E83110           | Hereditary hemochromatosis                                  | Hereditary hemochromatosis                                  |
| Hemochromatosis due to repeated red blood cell transfusions | 27502  | E83111           | Hemochromatosis due to repeated red blood cell transfusions | Hemochromatosis due to repeated red blood cell transfusions |
| Other hemochromatosis                                       | 27503  | E83118<br>E83119 | Other hemochromatosis                                       | Other hemochromatosis<br>Hemochromatosis, unspecified       |
| Other specified diseases of liver                           | NA     | K7689            | NA                                                          | Other specified diseases of liver                           |
| Autoimmune hepatitis                                        | 571.42 | K75.2-4          | Autoimmune hepatitis                                        | Autoimmune hepatitis                                        |
| a1 antitrypsin                                              | 273.4  | E88              | a1 antitrypsin                                              | a1 antitrypsin                                              |
| Primary sclerosing cholangitis                              | NA     | K83.01           | NA                                                          | Primary sclerosing cholangitis                              |
|                                                             |        |                  |                                                             |                                                             |
| <b>NAFLD*</b>                                               | NA     | K760             | NA                                                          | Fatty (change of) liver, not elsewhere classified           |
|                                                             | NA     | K7581            | NA                                                          | nonalcoholic steatohepatitis                                |
|                                                             | 2724   | E784             | Other and unspecified hyperlipidemia                        | Other hyperlipidemia                                        |
|                                                             | 2724   | E785             | Other and unspecified hyperlipidemia                        | Hyperlipidemia, unspecified                                 |
|                                                             | 4010   | I10              | Malignant essential hypertension                            | Essential (primary) hypertension                            |
|                                                             | 4011   | I10              | Benign essential hypertension                               | Essential (primary) hypertension                            |
|                                                             | 4019   | I10              | Unspecified essential hypertension                          | Essential (primary) hypertension                            |
|                                                             | 4019   | I169             | Unspecified essential hypertension                          | Hypertensive crisis, unspecified                            |
|                                                             | 40501  | I150             | Malignant renovascular hypertension                         | Renovascular hypertension                                   |
|                                                             | 40511  | I150             | Benign renovascular hypertension                            | Renovascular hypertension                                   |
|                                                             | 40519  | I158             | Other benign secondary hypertension                         | Other secondary hypertension                                |
|                                                             | 40591  | I150             | Unspecified renovascular hypertension                       | Renovascular hypertension                                   |
|                                                             | 40599  | I158             | Other unspecified secondary hypertension                    | Other secondary hypertension                                |
|                                                             | 278    | NA               | Overweight, obesity and other hyperalimentation             | NA                                                          |
|                                                             | 2501   | NA               | Diabetes with ketoacidosis                                  | NA                                                          |
|                                                             | 2502   | NA               | Diabetes with hyperosmolarity                               | NA                                                          |
|                                                             | 2503   | NA               | Diabetes with other coma                                    | NA                                                          |
|                                                             | 2504   | NA               | Diabetes with renal manifestations                          | NA                                                          |
|                                                             | 2505   | NA               | Diabetes with ophthalmic manifestations                     | NA                                                          |
|                                                             | 2506   | NA               | Diabetes with neurological manifestations                   | NA                                                          |
|                                                             | 2507   | NA               | Diabetes with peripheral circulatory disorders              | NA                                                          |
|                                                             | 2508   | NA               | Diabetes with other specified manifestations                | NA                                                          |
|                                                             | 2509   | NA               | Diabetes with unspecified complication                      | NA                                                          |
|                                                             | 2777   | E8881            | Dysmetabolic syndrome X                                     | Metabolic syndrome                                          |
|                                                             | 2780   | NA               | Overweight and obesity                                      | NA                                                          |

|  |       |        |                                                                                                            |                                                                                                          |
|--|-------|--------|------------------------------------------------------------------------------------------------------------|----------------------------------------------------------------------------------------------------------|
|  | 25000 | E119   | Diabetes mellitus without mention of complication, type II or unspecified type, not stated as uncontrolled | Type 2 diabetes mellitus without complications                                                           |
|  | 25002 | E1165  | Diabetes mellitus without mention of complication, type II or unspecified type, uncontrolled               | Type 2 diabetes mellitus with hyperglycemia                                                              |
|  |       |        |                                                                                                            |                                                                                                          |
|  | 25010 | E1110  | Diabetes with ketoacidosis, type II or unspecified type, not stated as uncontrolled                        | Type 2 diabetes mellitus with ketoacidosis without coma                                                  |
|  | 25010 | E1169  | Diabetes with ketoacidosis, type II or unspecified type, not stated as uncontrolled                        | Type 2 diabetes mellitus with other specified complication                                               |
|  | 25010 | E1310  | Diabetes with ketoacidosis, type II or unspecified type, not stated as uncontrolled                        | Other specified diabetes mellitus with ketoacidosis without coma                                         |
|  | 25012 | E1110  | Diabetes with ketoacidosis, type II or unspecified type, uncontrolled                                      | Type 2 diabetes mellitus with ketoacidosis without coma                                                  |
|  | 25012 | E1165  | Diabetes with ketoacidosis, type II or unspecified type, uncontrolled                                      | Type 2 diabetes mellitus with hyperglycemia                                                              |
|  | 25012 | E1169  | Diabetes with ketoacidosis, type II or unspecified type, uncontrolled                                      | Type 2 diabetes mellitus with other specified complication                                               |
|  | 25012 | E1310  | Diabetes with ketoacidosis, type II or unspecified type, uncontrolled                                      | Other specified diabetes mellitus with ketoacidosis without coma                                         |
|  | 25020 | E1100  | Diabetes with hyperosmolarity, type II or unspecified type, not stated as uncontrolled                     | Type 2 diabetes mellitus with hyperosmolarity without nonketotic hyperglycemic-hyperosmolar coma (NKHHC) |
|  | 25020 | E1101  | Diabetes with hyperosmolarity, type II or unspecified type, not stated as uncontrolled                     | Type 2 diabetes mellitus with hyperosmolarity with coma                                                  |
|  | 25022 | E1100  | Diabetes with hyperosmolarity, type II or unspecified type, uncontrolled                                   | Type 2 diabetes mellitus with hyperosmolarity without nonketotic hyperglycemic-hyperosmolar coma (NKHHC) |
|  | 25022 | E1165  | Diabetes with hyperosmolarity, type II or unspecified type, uncontrolled                                   | Type 2 diabetes mellitus with hyperglycemia                                                              |
|  | 25030 | E1111  | Diabetes with other coma, type II or unspecified type, not stated as uncontrolled                          | Type 2 diabetes mellitus with ketoacidosis with coma                                                     |
|  | 25030 | E11641 | Diabetes with other coma, type II or unspecified type, not stated as uncontrolled                          | Type 2 diabetes mellitus with hypoglycemia with coma                                                     |
|  | 25032 | E1101  | Diabetes with other coma, type II or unspecified type, uncontrolled                                        | Type 2 diabetes mellitus with hyperosmolarity with coma                                                  |
|  | 25032 | E1165  | Diabetes with other coma, type II or unspecified type, uncontrolled                                        | Type 2 diabetes mellitus with hyperglycemia                                                              |
|  | 25040 | E1129  | Diabetes with renal manifestations, type II or unspecified type, not stated as uncontrolled                | Type 2 diabetes mellitus with other diabetic kidney complication                                         |
|  | 25042 | E1121  | Diabetes with renal manifestations, type II or unspecified type, uncontrolled                              | Type 2 diabetes mellitus with diabetic nephropathy                                                       |
|  | 25042 | E1165  | Diabetes with renal manifestations, type II or unspecified type, uncontrolled                              | Type 2 diabetes mellitus with hyperglycemia                                                              |
|  | 25050 | E11311 | Diabetes with ophthalmic manifestations, type II or unspecified type, not stated as uncontrolled           | Type 2 diabetes mellitus with unspecified diabetic retinopathy with macular edema                        |

|  |       |        |                                                                                                         |                                                                                      |
|--|-------|--------|---------------------------------------------------------------------------------------------------------|--------------------------------------------------------------------------------------|
|  | 25050 | E11319 | Diabetes with ophthalmic manifestations, type II or unspecified type, not stated as uncontrolled        | Type 2 diabetes mellitus with unspecified diabetic retinopathy without macular edema |
|  | 25050 | E1136  | Diabetes with ophthalmic manifestations, type II or unspecified type, not stated as uncontrolled        | Type 2 diabetes mellitus with diabetic cataract                                      |
|  | 25050 | E1139  | Diabetes with ophthalmic manifestations, type II or unspecified type, not stated as uncontrolled        | Type 2 diabetes mellitus with other diabetic ophthalmic complication                 |
|  | 25052 | E11311 | Diabetes with ophthalmic manifestations, type II or unspecified type, uncontrolled                      | Type 2 diabetes mellitus with unspecified diabetic retinopathy with macular edema    |
|  | 25052 | E11319 | Diabetes with ophthalmic manifestations, type II or unspecified type, uncontrolled                      | Type 2 diabetes mellitus with unspecified diabetic retinopathy without macular edema |
|  | 25052 | E1136  | Diabetes with ophthalmic manifestations, type II or unspecified type, uncontrolled                      | Type 2 diabetes mellitus with diabetic cataract                                      |
|  | 25052 | E1139  | Diabetes with ophthalmic manifestations, type II or unspecified type, uncontrolled                      | Type 2 diabetes mellitus with other diabetic ophthalmic complication                 |
|  | 25052 | E1165  | Diabetes with ophthalmic manifestations, type II or unspecified type, uncontrolled                      | Type 2 diabetes mellitus with hyperglycemia                                          |
|  | 25060 | E1140  | Diabetes with neurological manifestations, type II or unspecified type, not stated as uncontrolled      | Type 2 diabetes mellitus with diabetic neuropathy, unspecified                       |
|  | 25062 | E1140  | Diabetes with neurological manifestations, type II or unspecified type, uncontrolled                    | Type 2 diabetes mellitus with diabetic neuropathy, unspecified                       |
|  | 25062 | E1165  | Diabetes with neurological manifestations, type II or unspecified type, uncontrolled                    | Type 2 diabetes mellitus with hyperglycemia                                          |
|  | 25070 | E1151  | Diabetes with peripheral circulatory disorders, type II or unspecified type, not stated as uncontrolled | Type 2 diabetes mellitus with diabetic peripheral angiopathy without gangrene        |
|  | 25072 | E1151  | Diabetes with peripheral circulatory disorders, type II or unspecified type, uncontrolled               | Type 2 diabetes mellitus with diabetic peripheral angiopathy without gangrene        |
|  | 25072 | E1165  | Diabetes with peripheral circulatory disorders, type II or unspecified type, uncontrolled               | Type 2 diabetes mellitus with hyperglycemia                                          |
|  | 25080 | E11618 | Diabetes with other specified manifestations, type II or unspecified type, not stated as uncontrolled   | Type 2 diabetes mellitus with other diabetic arthropathy                             |
|  | 25080 | E11620 | Diabetes with other specified manifestations, type II or unspecified type, not stated as uncontrolled   | Type 2 diabetes mellitus with diabetic dermatitis                                    |
|  | 25080 | E11621 | Diabetes with other specified manifestations, type II or unspecified type, not stated as uncontrolled   | Type 2 diabetes mellitus with foot ulcer                                             |
|  | 25080 | E11622 | Diabetes with other specified manifestations, type II or unspecified type, not stated as uncontrolled   | Type 2 diabetes mellitus with other skin ulcer                                       |
|  | 25080 | E11628 | Diabetes with other specified manifestations, type II or unspecified type, not stated as uncontrolled   | Type 2 diabetes mellitus with other skin complications                               |
|  | 25080 | E11630 | Diabetes with other specified manifestations, type II or unspecified type, not stated as uncontrolled   | Type 2 diabetes mellitus with periodontal disease                                    |
|  | 25080 | E11638 | Diabetes with other specified manifestations, type II or unspecified type, not stated as uncontrolled   | Type 2 diabetes mellitus with other oral complications                               |

|                                 |                    |                     |                                                                                                       |                                                            |
|---------------------------------|--------------------|---------------------|-------------------------------------------------------------------------------------------------------|------------------------------------------------------------|
|                                 | 25080              | E11649              | Diabetes with other specified manifestations, type II or unspecified type, not stated as uncontrolled | Type 2 diabetes mellitus with hypoglycemia without coma    |
|                                 | 25080              | E1165               | Diabetes with other specified manifestations, type II or unspecified type, not stated as uncontrolled | Type 2 diabetes mellitus with hyperglycemia                |
|                                 | 25080              | E1169               | Diabetes with other specified manifestations, type II or unspecified type, not stated as uncontrolled | Type 2 diabetes mellitus with other specified complication |
|                                 | 25082              | E1165               | Diabetes with other specified manifestations, type II or unspecified type, uncontrolled               | Type 2 diabetes mellitus with hyperglycemia                |
|                                 | 25082              | E1169               | Diabetes with other specified manifestations, type II or unspecified type, uncontrolled               | Type 2 diabetes mellitus with other specified complication |
|                                 | 25090              | E118                | Diabetes with unspecified complication, type II or unspecified type, not stated as uncontrolled       | Type 2 diabetes mellitus with unspecified complications    |
|                                 | 25092              | E1165               | Diabetes with unspecified complication, type II or unspecified type, uncontrolled                     | Type 2 diabetes mellitus with hyperglycemia                |
|                                 | 25092              | E118                | Diabetes with unspecified complication, type II or unspecified type, uncontrolled                     | Type 2 diabetes mellitus with unspecified complications    |
|                                 | 27800              | E669                | Obesity, unspecified                                                                                  | Obesity, unspecified                                       |
|                                 | 27801              | E6601               | Morbid obesity                                                                                        | Morbid (severe) obesity due to excess calories             |
|                                 | 27803              | E662                | Obesity hypoventilation syndrome                                                                      | Morbid (severe) obesity with alveolar hypoventilation      |
|                                 | V4586              | Z9884               | Bariatric surgery status                                                                              | Bariatric surgery status                                   |
|                                 | V8530              | Z6830               | Body Mass Index 30.0-30.9, adult                                                                      | Body mass index (BMI) 30.0-30.9, adult                     |
|                                 | V8531              | Z6831               | Body Mass Index 31.0-31.9, adult                                                                      | Body mass index (BMI) 31.0-31.9, adult                     |
|                                 | V8532              | Z6832               | Body Mass Index 32.0-32.9, adult                                                                      | Body mass index (BMI) 32.0-32.9, adult                     |
|                                 | V8533              | Z6833               | Body Mass Index 33.0-33.9, adult                                                                      | Body mass index (BMI) 33.0-33.9, adult                     |
|                                 | V8534              | Z6834               | Body Mass Index 34.0-34.9, adult                                                                      | Body mass index (BMI) 34.0-34.9, adult                     |
|                                 | V8535              | Z6835               | Body Mass Index 35.0-35.9, adult                                                                      | Body mass index (BMI) 35.0-35.9, adult                     |
|                                 | V8536              | Z6836               | Body Mass Index 36.0-36.9, adult                                                                      | Body mass index (BMI) 36.0-36.9, adult                     |
|                                 | V8537              | Z6837               | Body Mass Index 37.0-37.9, adult                                                                      | Body mass index (BMI) 37.0-37.9, adult                     |
|                                 | V8538              | Z6838               | Body Mass Index 38.0-38.9, adult                                                                      | Body mass index (BMI) 38.0-38.9, adult                     |
|                                 | V8539              | Z6839               | Body Mass Index 39.0-39.9, adult                                                                      | Body mass index (BMI) 39.0-39.9, adult                     |
|                                 | V854               | NA                  | Body mass index 40 and over, adult                                                                    | NA                                                         |
|                                 | V8541              | Z6841               | Body Mass Index 40.0-44.9, adult                                                                      | Body mass index (BMI) 40.0-44.9, adult                     |
|                                 | V8542              | Z6842               | Body Mass Index 45.0-49.9, adult                                                                      | Body mass index (BMI) 45.0-49.9, adult                     |
|                                 | V8543              | Z6843               | Body Mass Index 50.0-59.9, adult                                                                      | Body mass index (BMI) 50-59.9 , adult                      |
|                                 | V8544              | Z6844               | Body Mass Index 60.0-69.9, adult                                                                      | Body mass index (BMI) 60.0-69.9, adult                     |
|                                 | V8545              | Z6845               | Body Mass Index 70 and over, adult                                                                    | Body mass index (BMI) 70 or greater, adult                 |
| <b>Clinical characteristics</b> | <b>ICD-9 codes</b> | <b>ICD-10 codes</b> | <b>ICD-9 Description</b>                                                                              | <b>ICD-10 Description</b>                                  |
| <b>Cirrhosis</b>                | 5712               | K7030               | Alcoholic cirrhosis of liver                                                                          | Alcoholic cirrhosis of liver without ascites               |
|                                 | 5715               | K7460<br>K7469      | Cirrhosis of liver without mention of alcohol                                                         | Unspecified cirrhosis of liver<br>Other cirrhosis of liver |
|                                 | 5716               | K743                | Biliary cirrhosis                                                                                     | Primary biliary cirrhosis                                  |



|                               |       |                |                                                                                  |                                                                                     |
|-------------------------------|-------|----------------|----------------------------------------------------------------------------------|-------------------------------------------------------------------------------------|
|                               |       | K744<br>K745   |                                                                                  | Secondary biliary cirrhosis<br>Biliary cirrhosis, unspecified                       |
|                               | 5724  | K767           | Hepatorenal syndrome                                                             | Hepatorenal syndrome                                                                |
|                               | 7824  | R17            | Jaundice, unspecified, not of newborn                                            | Unspecified jaundice                                                                |
|                               | 56723 | K652           | Spontaneous bacterial peritonitis                                                | Spontaneous bacterial peritonitis                                                   |
|                               | 5723  | K766           | Portal hypertension                                                              | Portal hypertension                                                                 |
|                               | 456   | NA             | Varicose veins of other sites                                                    | NA                                                                                  |
|                               | 4560  | I8501          | Esophageal varices with bleeding                                                 | Esophageal varices with bleeding                                                    |
|                               | 4561  | I8500          | Esophageal varices without mention of bleeding                                   | Esophageal varices without bleeding                                                 |
|                               | 4562  | NA             | Esophageal varices in diseases classified elsewhere                              | NA                                                                                  |
|                               | 45620 | I8511          | Esophageal varices in diseases classified elsewhere, with bleeding               | Secondary esophageal varices with bleeding                                          |
|                               | 45621 | I8510          | Esophageal varices in diseases classified elsewhere, without mention of bleeding | Secondary esophageal varices without bleeding                                       |
|                               | NA    | K717           | NA                                                                               | Toxic liver disease with fibrosis and cirrhosis of liver                            |
|                               | NA    | K721           | NA                                                                               | Chronic hepatic failure                                                             |
|                               | NA    | K729           | NA                                                                               | Hepatic failure, unspecified                                                        |
|                               | NA    | I982           | NA                                                                               | Oesophageal varices without bleeding in diseases classified elsewhere               |
|                               | NA    | I983           | NA                                                                               | Oesophageal varices with bleeding in diseases classified elsewhere                  |
| <b>Ascites</b>                | 78951 | R180           | Malignant ascites                                                                | Malignant ascites                                                                   |
|                               | 78959 | R188           | Other ascites                                                                    | Other ascites                                                                       |
| <b>Hepatic encephalopathy</b> | 5722  | K7290<br>K7291 | Hepatic encephalopathy                                                           | Hepatic failure, unspecified without coma<br>Hepatic failure, unspecified with coma |

\*NAFLD was defined with ICD-10 codes (K760, K7581). As NAFLD is often under-coded, it was also defined with ICD-9 or 10 code for obesity, diabetes, history of bariatric surgery or both dyslipidemia and hypertension in the absence of HBV, HCV, alcohol abuse, and other known liver disease.

ALD, alcoholic liver disease; HBV, hepatitis B virus; HCC, hepatocellular carcinoma; HCV, hepatitis C virus; NAFLD, nonalcoholic fatty liver disease.



|                               |                     |        |                     |        |                     |        |                     |        |
|-------------------------------|---------------------|--------|---------------------|--------|---------------------|--------|---------------------|--------|
| Metro 250k to 1 million       | 0.79 (0.64 to 0.97) | 0.03   | 0.84 (0.67 to 1.05) | 0.13   | 1.00 (0.84 to 1.20) | 0.96   | 1.06 (0.87 to 1.28) | 0.58   |
| Metro < 250k                  | 0.58 (0.41 to 0.83) | 0.002  | 0.70 (0.49 to 1.01) | 0.06   | 1.06 (0.81 to 1.39) | 0.67   | 1.19 (0.90 to 1.59) | 0.22   |
| Non-Metro/Rural               | 0.57 (0.43 to 0.77) | <0.001 | 0.78 (0.57 to 1.06) | 0.11   | 0.78 (0.63 to 0.97) | 0.03   | 0.98 (0.77 to 1.24) | 0.85   |
| <b>NCI comorbidity index</b>  |                     |        |                     |        |                     |        |                     |        |
| Low (0 to 2)                  | ref                 | ref    | ref                 | ref    | ref                 | Ref    | ref                 | ref    |
| Moderate (>2 to 4)            | 0.75 (0.58 to 0.96) | 0.02   | 0.82 (0.63 to 1.07) | 0.15   | 1.15 (0.94 to 1.42) | 0.18   | 1.27 (1.03 to 1.58) | 0.03   |
| High (>4)                     | 0.88 (0.67 to 1.15) | 0.34   | 1.10 (0.82 to 1.47) | 0.53   | 1.38 (1.08 to 1.76) | 0.009  | 1.63 (1.26 to 2.11) | <0.001 |
| <b>Etiology</b>               |                     |        |                     |        |                     |        |                     |        |
| HCV                           | ref                 | ref    | ref                 | ref    | ref                 | Ref    | ref                 | ref    |
| NAFLD                         | 0.22 (0.17 to 0.28) | <0.001 | 0.24 (0.19 to 0.32) | <0.001 | 0.38 (0.32 to 0.45) | <0.001 | 0.34 (0.28 to 0.41) | <0.001 |
| ALD                           | 0.47 (0.38 to 0.59) | <0.001 | 0.56 (0.44 to 0.71) | <0.001 | 0.66 (0.54 to 0.80) | <0.001 | 0.65 (0.53 to 0.80) | <0.001 |
| HBV                           | 0.87 (0.62 to 1.21) | 0.41   | 0.77 (0.54 to 1.10) | 0.15   | 0.69 (0.49 to 0.96) | 0.03   | 0.71 (0.50 to 1.01) | 0.054  |
| Others/None                   | 0.33 (0.22 to 0.51) | <0.001 | 0.39 (0.25 to 0.60) | <0.001 | 0.38 (0.29 to 0.51) | <0.001 | 0.44 (0.32 to 0.59) | <0.001 |
| <b>Diabetes</b>               | 1.02 (0.86 to 1.22) | 0.79   | 1.24 (1.02 to 1.51) | 0.03   | 1.37 (1.18 to 1.59) | <0.001 | 1.60 (1.35 to 1.89) | <0.001 |
| <b>Ascites</b>                | 0.81 (0.69 to 0.96) | 0.01   | 0.78 (0.65 to 0.93) | 0.005  | 0.75 (0.65 to 0.86) | <0.001 | 0.69 (0.59 to 0.80) | <0.001 |
| <b>Hepatic encephalopathy</b> | 1.68 (1.40 to 2.00) | <0.001 | 1.67 (1.37 to 2.03) | <0.001 | 1.56 (1.31 to 1.86) | <0.001 | 1.40 (1.16 to 1.69) | <0.001 |

ALD, alcoholic liver disease; API, Asian/Pacific Islander; HBV, hepatitis B virus; HCC, hepatocellular carcinoma; HCV, hepatitis C virus; Metro, metropolitan; NAFLD, nonalcoholic fatty liver disease; NCI, National Cancer Institute.



|                               |                      |        |                     |        |                     |        |                     |        |
|-------------------------------|----------------------|--------|---------------------|--------|---------------------|--------|---------------------|--------|
| Metro 250k to 1 million       | 1.03 (0.62 to 1.71)  | 0.91   | 1.08 (0.64 to 1.83) | 0.77   | 0.99 (0.78 to 1.25) | 0.91   | 1.03 (0.81 to 1.31) | 0.81   |
| Metro < 250k                  | 0.52 (0.21 to 1.33)  | 0.17   | 0.48 (0.19 to 1.26) | 0.14   | 1.08 (0.78 to 1.51) | 0.64   | 1.14 (0.80 to 1.60) | 0.47   |
| Non-Metro/Rural               | 0.83 (0.45 to 1.54)  | 0.56   | 0.82 (0.43 to 1.59) | 0.56   | 0.87 (0.66 to 1.13) | 0.29   | 0.93 (0.70 to 1.23) | 0.60   |
| <b>NCI comorbidity index</b>  |                      |        |                     |        |                     |        |                     |        |
| Low (0 to 2)                  | ref                  | ref    | ref                 | ref    | ref                 | Ref    | ref                 | ref    |
| Moderate (>2 to 4)            | 0.87 (0.48 to 1.56)  | 0.63   | 0.87 (0.47 to 1.60) | 0.65   | 1.39 (1.08 to 1.79) | 0.01   | 1.40 (1.08 to 1.83) | 0.01   |
| High (>4)                     | 1.11 (0.61 to 2.00)  | 0.73   | 1.11 (0.60 to 2.07) | 0.74   | 1.49 (1.12 to 1.97) | 0.006  | 1.50 (1.12 to 2.01) | 0.006  |
| <b>Diabetes</b>               | 1.07 (0.60 to 1.92)  | 0.81   | 0.82 (0.44 to 1.50) | 0.51   | 1.34 (1.04 to 1.73) | 0.02   | 1.21 (0.93 to 1.57) | 0.17   |
| <b>Cirrhosis</b>              | 6.02 (3.19 to 11.37) | <0.001 | 4.93 (2.44 to 9.97) | <0.001 | 1.70 (1.41 to 2.05) | <0.001 | 1.80 (1.40 to 2.32) | <0.001 |
| <b>Ascites</b>                | 2.13 (1.41 to 3.21)  | <0.001 | 0.91 (0.57 to 1.44) | 0.68   | 1.20 (0.99 to 1.45) | 0.07   | 0.73 (0.56 to 0.94) | 0.02   |
| <b>Hepatic encephalopathy</b> | 3.11 (1.89 to 5.11)  | <0.001 | 1.76 (1.03 to 2.98) | 0.04   | 1.93 (1.39 to 2.67) | <0.001 | 1.44 (1.02 to 2.04) | 0.04   |

API, Asian/Pacific Islander; HCC, hepatocellular carcinoma; Metro, metropolitan; NAFLD, nonalcoholic fatty liver disease; NCI, National Cancer Institute.

**Supplementary Table 4. Factors associated with early-stage HCC detection and curative treatment receipt among NAFLD patients.**

| Characteristics                  | Early-stage HCC (Single & ≤5 cm tumor) |         |                        |         | Curative treatments |         |                        |         |
|----------------------------------|----------------------------------------|---------|------------------------|---------|---------------------|---------|------------------------|---------|
|                                  | Univariate analysis                    |         | Multivariable analysis |         | Univariate analysis |         | Multivariable analysis |         |
|                                  | OR (95% CI)                            | P value | aOR (95% CI)           | P value | OR (95% CI)         | P value | aOR (95% CI)           | P value |
| <b>Female Sex</b><br>(Ref. Male) | 1.44 (1.09 to 1.90)                    | 0.01    | 1.42 (1.06 to 1.89)    | 0.02    | 1.09 (0.85 to 1.40) | 0.52    | 1.06 (0.81 to 1.39)    | 0.67    |
| <b>Age</b>                       | 0.97 (0.94 to 0.99)                    | 0.002   | 0.97 (0.94 to 0.99)    | 0.003   | 0.94 (0.92 to 0.96) | <0.001  | 0.94 (0.92 to 0.96)    | <0.001  |
| <b>Race/ethnicity</b>            |                                        |         |                        |         |                     |         |                        |         |
| Non-Hispanic White               | ref                                    | ref     | ref                    | ref     | ref                 | ref     | ref                    | ref     |
| Non-Hispanic Black               | 0.30 (0.09 to 0.96)                    | 0.04    | 0.26 (0.08 to 0.83)    | 0.02    | 0.50 (0.23 to 1.10) | 0.08    | 0.49 (0.21 to 1.11)    | 0.09    |
| Non-Hispanic<br>API/Others       | 0.77 (0.48 to 1.25)                    | 0.29    | 0.73 (0.45 to 1.20)    | 0.21    | 1.04 (0.71 to 1.52) | 0.84    | 1.14 (0.76 to 1.70)    | 0.54    |
| Hispanic                         | 1.56 (1.07 to 2.30)                    | 0.02    | 1.32 (0.88 to 1.98)    | 0.19    | 0.99 (0.68 to 1.45) | 0.96    | 0.82 (0.54 to 1.24)    | 0.35    |
| <b>Census Poverty Level</b>      |                                        |         |                        |         |                     |         |                        |         |
| <5%                              | ref                                    | ref     | ref                    | ref     | ref                 | Ref     | ref                    | ref     |
| 5% to <10%                       | 1.07 (0.70 to 1.64)                    | 0.76    | 1.13 (0.73 to 1.75)    | 0.57    | 0.74 (0.52 to 1.05) | 0.09    | 0.72 (0.50 to 1.05)    | 0.08    |
| 10% to <20%                      | 1.27 (0.85 to 1.90)                    | 0.24    | 1.29 (0.85 to 1.95)    | 0.23    | 0.70 (0.50 to 0.98) | 0.04    | 0.63 (0.44 to 0.91)    | 0.01    |
| 20% to 100%                      | 1.17 (0.76 to 1.79)                    | 0.47    | 1.20 (0.76 to 1.90)    | 0.42    | 0.86 (0.61 to 1.22) | 0.41    | 0.84 (0.57 to 1.23)    | 0.37    |
| <b>Rural-Urban</b>               |                                        |         |                        |         |                     |         |                        |         |
| Metro > 1 million                | ref                                    | ref     | ref                    | ref     | ref                 | ref     | Ref                    | ref     |

|                                                   |                     |      |                     |        |                     |        |                     |        |
|---------------------------------------------------|---------------------|------|---------------------|--------|---------------------|--------|---------------------|--------|
| Metro 250k to 1 million                           | 1.12 (0.80 to 1.57) | 0.52 | 1.10 (0.78 to 1.55) | 0.60   | 1.00 (0.74 to 1.36) | 0.99   | 0.95 (0.69 to 1.31) | 0.74   |
| Metro < 250k                                      | 0.60 (0.34 to 1.07) | 0.08 | 0.54 (0.30 to 0.97) | 0.04   | 0.92 (0.60 to 1.43) | 0.72   | 0.98 (0.62 to 1.56) | 0.94   |
| Non-Metro/Rural                                   | 0.85 (0.56 to 1.28) | 0.44 | 0.77 (0.50 to 1.18) | 0.23   | 0.88 (0.62 to 1.26) | 0.50   | 0.85 (0.58 to 1.26) | 0.42   |
| <b>NCI comorbidity index</b>                      |                     |      |                     |        |                     |        |                     |        |
| Low (0 to 2)                                      | ref                 | ref  | ref                 | ref    | Ref                 | Ref    | ref                 | ref    |
| Moderate (>2 to 4)                                | 0.70 (0.46 to 1.05) | 0.08 | 0.72 (0.47 to 1.10) | 0.13   | 0.75 (0.53 to 1.05) | 0.09   | 0.83 (0.58 to 1.18) | 0.30   |
| High (>4)                                         | 0.91 (0.60 to 1.37) | 0.64 | 0.99 (0.65 to 1.53) | 0.98   | 0.41 (0.26 to 0.65) | <0.001 | 0.43 (0.27 to 0.70) | 0.001  |
| <b>Diabetes</b>                                   | 1.05 (0.72 to 1.54) | 0.80 | 1.00 (0.67 to 1.49) | 0.99   | 0.96 (0.69 to 1.34) | 0.83   | 1.01 (0.71 to 1.43) | 0.97   |
| <b>Cirrhosis</b>                                  | 1.13 (0.85 to 1.49) | 0.40 | 1.44 (1.02 to 2.02) | 0.04   | 0.93 (0.73 to 1.19) | 0.58   | 1.14 (0.83 to 1.56) | 0.42   |
| <b>Ascites</b>                                    | 0.68 (0.50 to 0.93) | 0.01 | 0.51 (0.35 to 0.73) | <0.001 | 0.64 (0.49 to 0.84) | 0.001  | 0.61 (0.43 to 0.86) | 0.004  |
| <b>Hepatic encephalopathy</b>                     | 1.14 (0.74 to 1.77) | 0.55 | 1.09 (0.68 to 1.76) | 0.71   | 0.95 (0.63 to 1.43) | 0.81   | 1.02 (0.65 to 1.59) | 0.95   |
| <b>Early-stage HCC (Single &amp; ≤5 cm tumor)</b> | N/A                 | N/A  | N/A                 | N/A    | 3.68 (2.74 to 4.96) | <0.001 | 3.45 (2.53 to 4.70) | <0.001 |

API, Asian/Pacific Islander; HCC, hepatocellular carcinoma; Metro, metropolitan; NAFLD, nonalcoholic fatty liver disease; NCI, National Cancer Institute.

**Supplementary Table 5. Factors associated with overall survival among NAFLD patients.**

| Characteristics                  | Univariate analysis |         | Multivariable analysis |         |
|----------------------------------|---------------------|---------|------------------------|---------|
|                                  | HR (95% CI)         | P value | aHR (95% CI)           | P value |
| <b>Female Sex</b><br>(Ref. Male) | 0.93 (0.83 to 1.04) | 0.22    | 1.00 (0.88 to 1.13)    | 0.99    |
| <b>Age</b>                       | 1.02 (1.01 to 1.03) | <0.001  | 1.01 (1.00 to 1.02)    | 0.005   |
| <b>Race/ethnicity</b>            |                     |         |                        |         |
| Non-Hispanic White               | ref                 | ref     | ref                    | ref     |
| Non-Hispanic Black               | 1.17 (0.87 to 1.57) | 0.31    | 1.02 (0.75 to 1.39)    | 0.89    |
| Non-Hispanic API/Others          | 0.89 (0.74 to 1.06) | 0.20    | 0.85 (0.71 to 1.03)    | 0.09    |
| Hispanic                         | 0.93 (0.78 to 1.10) | 0.38    | 0.82 (0.68 to 0.98)    | 0.03    |
| <b>Census Poverty Level</b>      |                     |         |                        |         |
| <5%                              | Ref                 | ref     | ref                    | ref     |
| 5% to <10%                       | 1.12 (0.95 to 1.32) | 0.18    | 1.11 (0.94 to 1.32)    | 0.21    |
| 10% to <20%                      | 1.12 (0.96 to 1.32) | 0.15    | 1.09 (0.92 to 1.28)    | 0.31    |
| 20% to 100%                      | 1.11 (0.94 to 1.32) | 0.22    | 1.22 (1.02 to 1.47)    | 0.03    |
| <b>Rural-Urban</b>               |                     |         |                        |         |
| Metro > 1 million                | ref                 | ref     | ref                    | ref     |
| Metro 250k to 1 million          | 1.09 (0.95 to 1.26) | 0.21    | 1.13 (0.98 to 1.31)    | 0.09    |
| Metro < 250k                     | 0.95 (0.78 to 1.17) | 0.64    | 0.84 (0.68 to 1.03)    | 0.09    |



|                                                   |                     |        |                     |        |
|---------------------------------------------------|---------------------|--------|---------------------|--------|
| Non-Metro/Rural                                   | 1.10 (0.94 to 1.30) | 0.22   | 1.01 (0.85 to 1.19) | 0.93   |
| <b>NCI comorbidity index</b>                      |                     |        |                     |        |
| Low (0 to 2)                                      | Ref                 | ref    | ref                 | Ref    |
| Moderate (>2 to 4)                                | 1.18 (1.01 to 1.37) | 0.04   | 1.06 (0.91 to 1.24) | 0.43   |
| High (>4)                                         | 1.40 (1.18 to 1.66) | <0.001 | 1.11 (0.93 to 1.33) | 0.24   |
| <b>Diabetes</b>                                   | 1.05 (0.90 to 1.22) | 0.52   | 1.05 (0.89 to 1.22) | 0.58   |
| <b>Cirrhosis</b>                                  | 1.23 (1.10 to 1.38) | <0.001 | 1.01 (0.87 to 1.17) | 0.87   |
| <b>Ascites</b>                                    | 1.79 (1.59 to 2.01) | <0.001 | 1.86 (1.59 to 2.17) | <0.001 |
| <b>Hepatic encephalopathy</b>                     | 1.69 (1.41 to 2.03) | <0.001 | 1.66 (1.36 to 2.02) | <0.001 |
| <b>Surveillance</b>                               |                     |        |                     |        |
| No                                                | ref                 | ref    | Ref                 | ref    |
| Inconsistent                                      | 0.69 (0.61 to 0.77) | <0.001 | 0.75 (0.67 to 0.85) | <0.001 |
| Consistent                                        | 0.53 (0.41 to 0.68) | <0.001 | 0.53 (0.40 to 0.69) | <0.001 |
| <b>Early-stage HCC (Single &amp; ≤5 cm tumor)</b> | 0.44 (0.37 to 0.52) | <0.001 | 0.54 (0.45 to 0.64) | <0.001 |
| <b>Curative treatments</b>                        | 0.24 (0.20 to 0.28) | <0.001 | 0.25 (0.21 to 0.30) | <0.001 |

API, Asian/Pacific Islander; HCC, hepatocellular carcinoma; Metro, metropolitan; NAFLD, nonalcoholic fatty liver disease; NCI, National Cancer Institute.



|                                         |                     |        |                     |        |                     |        |                     |        |
|-----------------------------------------|---------------------|--------|---------------------|--------|---------------------|--------|---------------------|--------|
| Metro 250k to 1 million                 | 0.73 (0.58 to 0.91) | 0.005  | 0.83 (0.65 to 1.05) | 0.12   | 0.88 (0.75 to 1.04) | 0.13   | 0.96 (0.80 to 1.14) | 0.63   |
| Metro < 250k                            | 0.50 (0.35 to 0.72) | <0.001 | 0.62 (0.42 to 0.91) | 0.01   | 0.89 (0.70 to 1.13) | 0.34   | 1.01 (0.79 to 1.30) | 0.93   |
| Non-Metro/Rural                         | 0.54 (0.40 to 0.73) | <0.001 | 0.75 (0.54 to 1.04) | 0.08   | 0.68 (0.56 to 0.83) | <0.001 | 0.83 (0.67 to 1.04) | 0.10   |
| <b>NCI comorbidity index</b>            |                     |        |                     |        |                     |        |                     |        |
| Low (0 to 2)                            | ref                 | ref    | ref                 | ref    | ref                 | Ref    | ref                 | ref    |
| Moderate (>2 to 4)                      | 0.75 (0.59 to 0.96) | 0.02   | 0.82 (0.63 to 1.08) | 0.16   | 1.17 (0.98 to 1.40) | 0.09   | 1.30 (1.07 to 1.57) | 0.008  |
| High (>4)                               | 0.80 (0.61 to 1.05) | 0.11   | 0.99 (0.74 to 1.33) | 0.96   | 1.25 (1.02 to 1.53) | 0.03   | 1.45 (1.17 to 1.81) | 0.001  |
| <b>Etiology</b>                         |                     |        |                     |        |                     |        |                     |        |
| NAFLD without co-existing liver disease | ref                 | ref    | ref                 | ref    | ref                 | Ref    | ref                 | ref    |
| NAFLD with HCV                          | 6.89 (5.43 to 8.75) | <0.001 | 4.37 (3.38 to 5.65) | <0.001 | 3.39 (2.88 to 3.98) | <0.001 | 2.63 (2.19 to 3.16) | <0.001 |
| NAFLD with HBV                          | 6.09 (4.15 to 8.93) | <0.001 | 3.44 (2.27 to 5.23) | <0.001 | 2.50 (1.79 to 3.50) | <0.001 | 1.92 (1.33 to 2.75) | <0.001 |
| NAFLD with ALD                          | 3.28 (2.47 to 4.35) | <0.001 | 2.50 (1.85 to 3.37) | <0.001 | 2.37 (1.97 to 2.85) | <0.001 | 1.91 (1.56 to 2.33) | <0.001 |
| NAFLD with Others/None                  | 3.03 (1.83 to 5.02) | <0.001 | 2.38 (1.41 to 4.02) | 0.001  | 2.46 (1.68 to 3.61) | <0.001 | 2.20 (1.49 to 3.26) | <0.001 |
| <b>Diabetes</b>                         | 1.03 (0.83 to 1.29) | 0.77   | 1.03 (0.81 to 1.31) | 0.84   | 1.12 (0.95 to 1.33) | 0.18   | 1.09 (0.91 to 1.31) | 0.34   |
| <b>Cirrhosis</b>                        | 6.28 (4.49 to 8.78) | <0.001 | 3.32 (2.30 to 4.79) | <0.001 | 2.62 (2.27 to 3.02) | <0.001 | 1.93 (1.60 to 2.32) | <0.001 |
| <b>Ascites</b>                          | 1.48 (1.25 to 1.75) | <0.001 | 0.83 (0.68 to 1.01) | 0.06   | 1.33 (1.17 to 1.52) | <0.001 | 0.74 (0.62 to 0.87) | <0.001 |
| <b>Hepatic encephalopathy</b>           | 2.42 (2.00 to 2.93) | <0.001 | 1.76 (1.42 to 2.17) | <0.001 | 2.23 (1.84 to 2.70) | <0.001 | 1.54 (1.25 to 1.90) | <0.001 |

ALD, alcoholic liver disease; API, Asian/Pacific Islander; HBV, hepatitis B virus; HCC, hepatocellular carcinoma; HCV, hepatitis C virus; Metro, metropolitan;

NAFLD, nonalcoholic fatty liver disease; NCI, National Cancer Institute.

Journal Pre-proof



|                                         |                     |        |                     |        |                     |        |                     |        |
|-----------------------------------------|---------------------|--------|---------------------|--------|---------------------|--------|---------------------|--------|
| Metro > 1 million                       | ref                 | ref    | ref                 | ref    | ref                 | ref    | Ref                 | ref    |
| Metro 250k to 1 million                 | 0.90 (0.74 to 1.09) | 0.28   | 0.92 (0.75 to 1.13) | 0.45   | 1.02 (0.85 to 1.22) | 0.83   | 1.07 (0.88 to 1.30) | 0.50   |
| Metro < 250k                            | 0.71 (0.53 to 0.96) | 0.03   | 0.74 (0.54 to 1.02) | 0.07   | 0.74 (0.56 to 0.97) | 0.03   | 0.87 (0.65 to 1.18) | 0.38   |
| Non-Metro/Rural                         | 0.71 (0.54 to 0.91) | 0.008  | 0.76 (0.57 to 1.00) | 0.048  | 0.71 (0.56 to 0.91) | 0.006  | 0.79 (0.60 to 1.03) | 0.09   |
| <b>NCI comorbidity index</b>            |                     |        |                     |        |                     |        |                     |        |
| Low (0 to 2)                            | ref                 | ref    | ref                 | ref    | Ref                 | Ref    | ref                 | ref    |
| Moderate (>2 to 4)                      | 0.74 (0.59 to 0.93) | 0.009  | 0.80 (0.63 to 1.01) | 0.06   | 0.64 (0.52 to 0.80) | <0.001 | 0.77 (0.61 to 0.96) | 0.02   |
| High (>4)                               | 0.92 (0.73 to 1.17) | 0.52   | 1.07 (0.83 to 1.38) | 0.59   | 0.39 (0.30 to 0.52) | <0.001 | 0.47 (0.35 to 0.63) | <0.001 |
| <b>Etiology</b>                         |                     |        |                     |        |                     |        |                     |        |
| NAFLD without co-existing liver disease | Ref                 | ref    | ref                 | ref    | ref                 | Ref    | ref                 | ref    |
| NAFLD with HCV                          | 2.15 (1.79 to 2.59) | <0.001 | 1.91 (1.55 to 2.36) | <0.001 | 1.80 (1.52 to 2.14) | <0.001 | 1.34 (1.09 to 1.65) | 0.005  |
| NAFLD with HBV                          | 2.41 (1.70 to 3.42) | <0.001 | 2.07 (1.42 to 3.03) | <0.001 | 3.07 (2.25 to 4.20) | <0.001 | 1.93 (1.34 to 2.77) | <0.001 |
| NAFLD with ALD                          | 1.82 (1.46 to 2.27) | <0.001 | 1.79 (1.41 to 2.28) | <0.001 | 1.26 (1.02 to 1.55) | 0.03   | 1.08 (0.85 to 1.37) | 0.52   |
| NAFLD with Others/None                  | 2.30 (1.55 to 3.42) | <0.001 | 2.08 (1.39 to 3.13) | <0.001 | 2.51 (1.75 to 3.60) | <0.001 | 1.97 (1.34 to 2.91) | 0.001  |
| <b>Diabetes</b>                         | 0.92 (0.76 to 1.13) | 0.44   | 0.97 (0.79 to 1.19) | 0.78   | 0.86 (0.72 to 1.03) | 0.11   | 0.94 (0.77 to 1.14) | 0.52   |
| <b>Cirrhosis</b>                        | 1.73 (1.42 to 2.11) | <0.001 | 1.69 (1.34 to 2.13) | <0.001 | 1.22 (1.02 to 1.44) | 0.03   | 1.21 (0.97 to 1.50) | 0.09   |
| <b>Ascites</b>                          | 0.77 (0.66 to 0.90) | 0.001  | 0.56 (0.47 to 0.67) | <0.001 | 0.60 (0.52 to 0.70) | <0.001 | 0.56 (0.47 to 0.67) | <0.001 |
| <b>Hepatic encephalopathy</b>           | 1.10 (0.90 to 1.34) | 0.34   | 1.00 (0.81 to 1.24) | 1.00   | 0.77 (0.63 to 0.93) | 0.008  | 0.77 (0.62 to 0.97) | 0.02   |

|                                                   |     |     |     |     |                     |        |                     |        |
|---------------------------------------------------|-----|-----|-----|-----|---------------------|--------|---------------------|--------|
| <b>Early-stage HCC (Single &amp; ≤5 cm tumor)</b> | N/A | N/A | N/A | N/A | 3.66 (3.11 to 4.31) | <0.001 | 3.28 (2.75 to 3.90) | <0.001 |
|---------------------------------------------------|-----|-----|-----|-----|---------------------|--------|---------------------|--------|

ALD, alcoholic liver disease; API, Asian/Pacific Islander; HBV, hepatitis B virus; HCC, hepatocellular carcinoma; HCV, hepatitis C virus; Metro, metropolitan;

NAFLD, nonalcoholic fatty liver disease; NCI, National Cancer Institute.

Journal Pre-proof

**Supplementary Table 8. Factors associated with overall survival among patients with NAFLD alone vs. NAFLD with coexisting liver diseases.**

| Characteristics                  | Univariate analysis |         | Multivariable analysis |         |
|----------------------------------|---------------------|---------|------------------------|---------|
|                                  | HR (95% CI)         | P value | aHR (95% CI)           | P value |
| <b>Female Sex</b><br>(Ref. Male) | 0.89 (0.82 to 0.96) | 0.004   | 0.93 (0.86 to 1.01)    | 0.10    |
| <b>Age</b>                       | 1.02 (1.02 to 1.03) | <0.001  | 1.01 (1.01 to 1.02)    | <0.001  |
| <b>Race/ethnicity</b>            |                     |         |                        |         |
| Non-Hispanic White               | ref                 | ref     | ref                    | ref     |
| Non-Hispanic Black               | 0.98 (0.85 to 1.14) | 0.82    | 0.99 (0.84 to 1.15)    | 0.86    |
| Non-Hispanic API/Others          | 0.65 (0.58 to 0.72) | <0.001  | 0.83 (0.74 to 0.93)    | 0.001   |
| Hispanic                         | 0.93 (0.83 to 1.03) | 0.18    | 0.85 (0.76 to 0.95)    | 0.004   |
| <b>Census Poverty Level</b>      |                     |         |                        |         |
| <5%                              | ref                 | ref     | ref                    | ref     |
| 5% to <10%                       | 1.14 (1.02 to 1.27) | 0.02    | 1.06 (0.95 to 1.18)    | 0.30    |
| 10% to <20%                      | 1.13 (1.01 to 1.25) | 0.03    | 1.08 (0.97 to 1.20)    | 0.17    |
| 20% to 100%                      | 1.11 (1.00 to 1.24) | 0.06    | 1.11 (0.98 to 1.24)    | 0.09    |
| <b>Rural-Urban</b>               |                     |         |                        |         |
| Metro > 1 million                | ref                 | ref     | ref                    | ref     |
| Metro 250k to 1 million          | 1.17 (1.07 to 1.29) | 0.001   | 1.18 (1.08 to 1.30)    | 0.001   |
| Metro < 250k                     | 1.26 (1.10 to 1.43) | 0.001   | 1.06 (0.93 to 1.22)    | 0.37    |



|                                         |                     |        |                     |        |
|-----------------------------------------|---------------------|--------|---------------------|--------|
| Non-Metro/Rural                         | 1.31 (1.17 to 1.46) | <0.001 | 1.12 (0.99 to 1.26) | 0.07   |
| <b>NCI comorbidity index</b>            |                     |        |                     |        |
| Low (0 to 2)                            | ref                 | ref    | ref                 | ref    |
| Moderate (>2 to 4)                      | 1.24 (1.12 to 1.37) | <0.001 | 1.09 (0.99 to 1.21) | 0.08   |
| High (>4)                               | 1.57 (1.40 to 1.76) | <0.001 | 1.26 (1.12 to 1.41) | <0.001 |
| <b>Etiology</b>                         |                     |        |                     |        |
| NAFLD without co-existing liver disease | ref                 | ref    | ref                 | ref    |
| NAFLD with HCV                          | 0.75 (0.69 to 0.82) | <0.001 | 0.84 (0.76 to 0.93) | 0.001  |
| NAFLD with HBV                          | 0.61 (0.51 to 0.74) | <0.001 | 0.88 (0.72 to 1.07) | 0.20   |
| NAFLD with ALD                          | 0.98 (0.89 to 1.08) | 0.71   | 0.91 (0.81 to 1.01) | 0.08   |
| NAFLD with Others/None                  | 0.58 (0.46 to 0.73) | <0.001 | 0.66 (0.52 to 0.83) | <0.001 |
| <b>Diabetes</b>                         | 1.14 (1.03 to 1.25) | 0.009  | 1.05 (0.95 to 1.16) | 0.35   |
| <b>Cirrhosis</b>                        | 1.05 (0.97 to 1.15) | 0.22   | 1.00 (0.90 to 1.11) | 0.95   |
| <b>Ascites</b>                          | 1.80 (1.67 to 1.93) | <0.001 | 1.81 (1.66 to 1.98) | <0.001 |
| <b>Hepatic encephalopathy</b>           | 1.57 (1.44 to 1.73) | <0.001 | 1.47 (1.33 to 1.63) | <0.001 |
| <b>Surveillance</b>                     |                     |        |                     |        |
| No                                      | ref                 | ref    | Ref                 | ref    |
| Inconsistent                            | 0.68 (0.63 to 0.74) | <0.001 | 0.75 (0.69 to 0.82) | <0.001 |
| Consistent                              | 0.51 (0.46 to 0.57) | <0.001 | 0.66 (0.58 to 0.75) | <0.001 |

|                                                   |                     |        |                     |        |
|---------------------------------------------------|---------------------|--------|---------------------|--------|
| <b>Early-stage HCC (Single &amp; ≤5 cm tumor)</b> | 0.46 (0.42 to 0.51) | <0.001 | 0.58 (0.52 to 0.64) | <0.001 |
| <b>Curative treatments</b>                        | 0.27 (0.25 to 0.30) | <0.001 | 0.31 (0.28 to 0.34) | <0.001 |

ALD, alcoholic liver disease; API, Asian/Pacific Islander; HBV, hepatitis B virus; HCC, hepatocellular carcinoma; HCV, hepatitis C virus; Metro, metropolitan;

NAFLD, nonalcoholic fatty liver disease; NCI, National Cancer Institute.

Journal Pre-proof

## SUPPLEMENTARY FIGURES

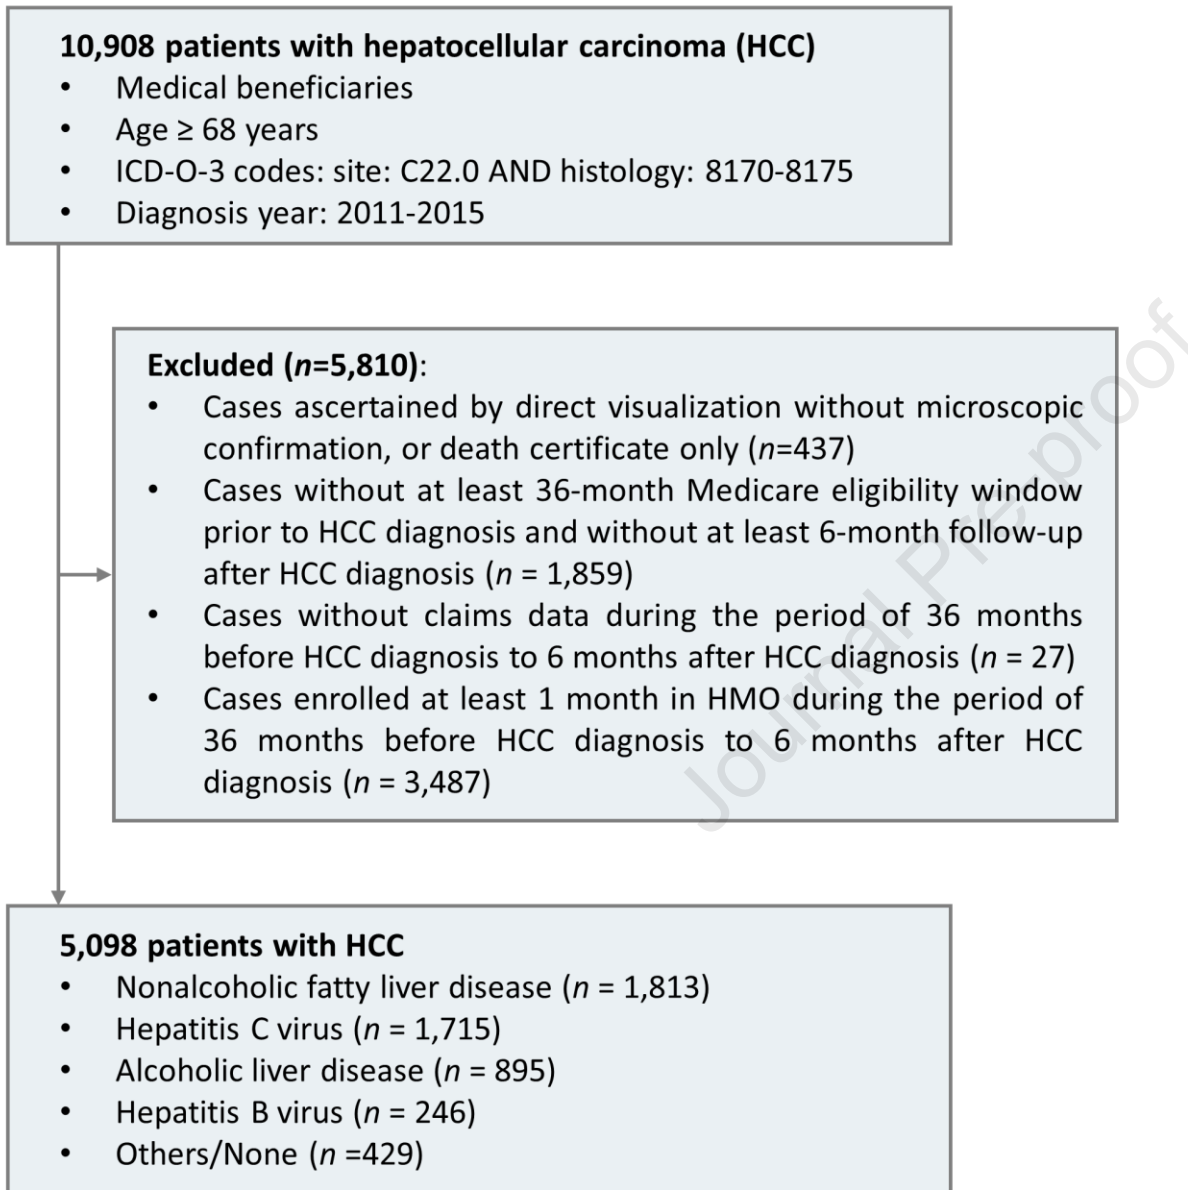

Supplementary Figure 1. Study flow of the hepatocellular carcinoma (HCC) cohort selection, SEER-Medicare database.

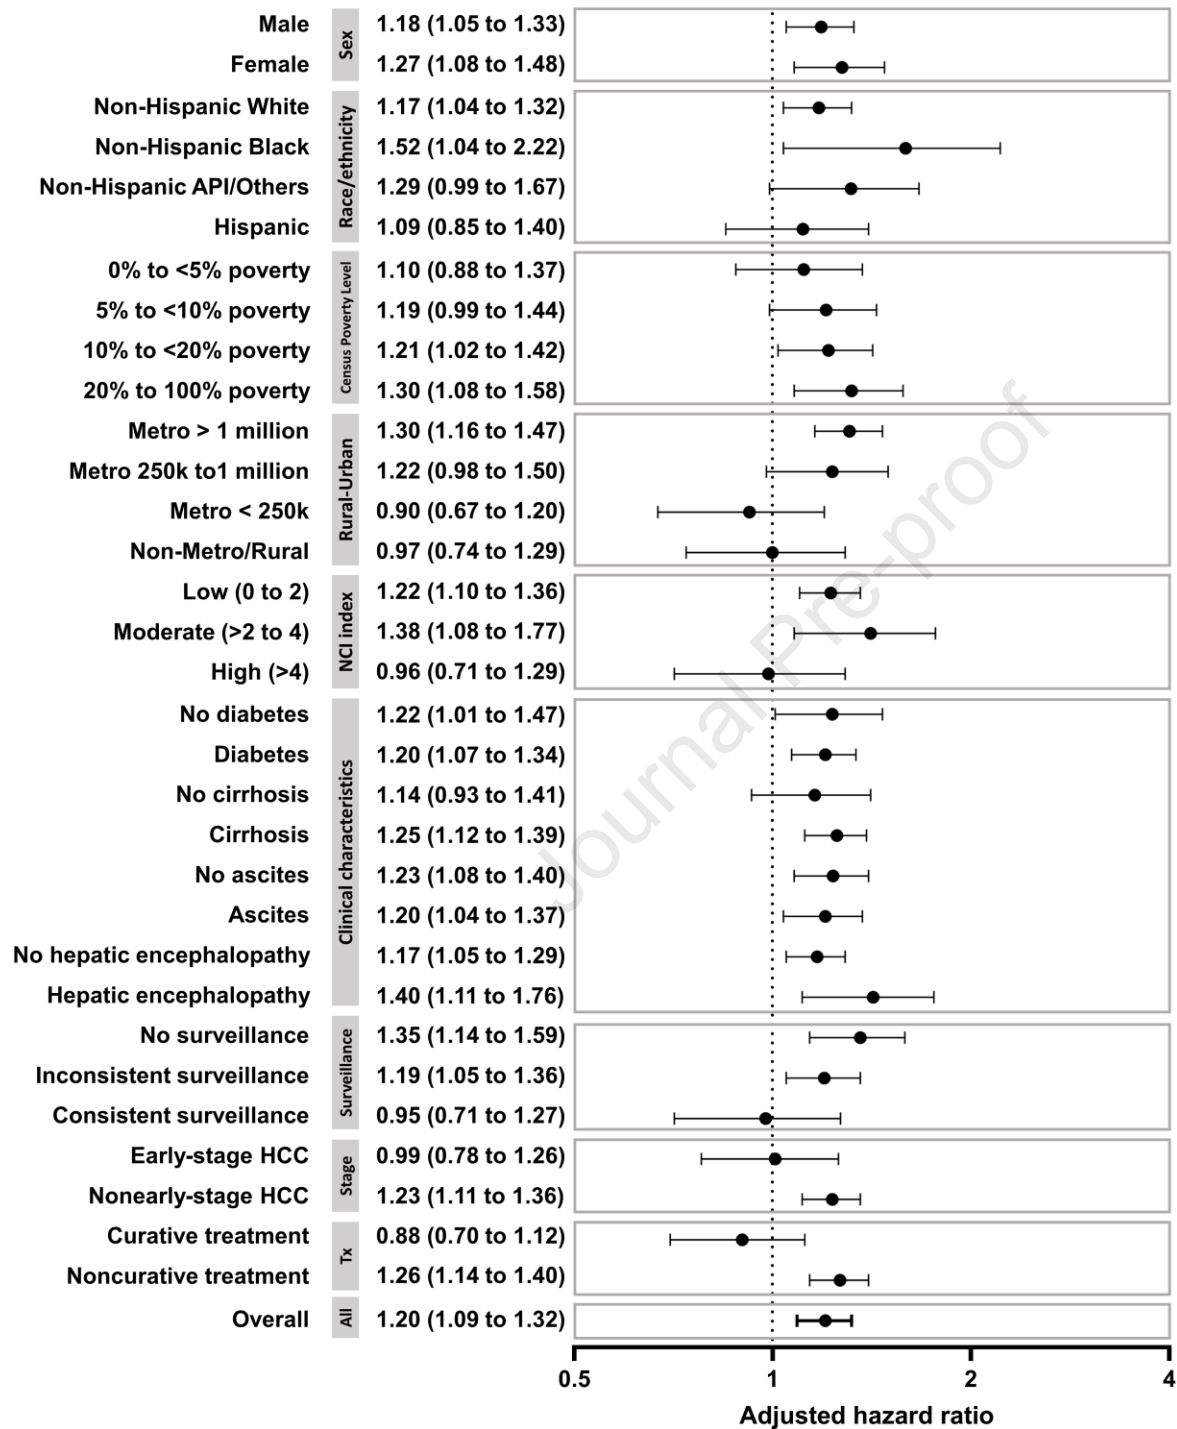

Adjusted hazard ratio

**Supplementary Figure 2. NAFLD as a predictor of overall survival in various subgroups.**

NAFLD was associated with worse survival across most examined subgroups.

aHR of NAFLD with HCV as a reference group. Error bars represent the 95% confidence intervals of aHR

API, Asian/Pacific Islander; HCC, hepatocellular carcinoma; HCV, hepatitis C virus; Metro, metropolitan; NAFLD, nonalcoholic fatty liver disease; NCI, National Cancer Institute.

Journal Pre-proof
